# Supplementary material for: Measuring body dimensions of leopards (Panthera pardus) from camera trap photographs
Source: PeerJ. 2019 Sep 18;7:e7630. doi: 10.7717/peerj.7630 (PMC6754725; doi:10.7717/peerj.7630)
Supplement: Supplemental Information 1 [file peerj-07-7630-s001.csv]

Sample #	Image #	Actual measurement	ImageJ measurement	absolute.difference	scaling.factor	gender	posture	bodytype.measurement	leopard.ID	station.ID	Category
1	I__00040	86.5	83.5	3	10.4	M	ab.bf.pt	BL	Hunyugwe	s36	5
2	I__00098	86.5	79.9	6.6	8.7	M	ab.bf.pt	BL	Hunyugwe	s35	5
3	I__00005	78.5	71.2	7.3	11	M	ab.bf.pt	BL	Mubangweni	s55	5
4	I__00007	78.5	70.9	7.6	10.5	M	ab.bf.pt	BL	Mubangweni	s55	5
5	I__00026	78.5	71.4	7.1	10.8	M	ab.bf.pt	BL	Mubangweni	s55	5
6	I__00032	78.5	73.8	4.7	10.8	M	ab.bf.pt	BL	Mubangweni	s55	5
7	I__00038	68.7	62.7	6	9.8	F	ab.bf.pt	BL	Chipinyuluzi	s94	5
8	I__00090	67.2	68.7	1.5	9.9	F	ab.bf.pt	BL	Swamps	s78	5
9	I__00092	67.2	71.8	4.6	10	F	ab.bf.pt	BL	Swamps	s78	5
10	I__00093	67.2	72.9	5.7	9.9	F	ab.bf.pt	BL	Swamps	s78	5
11	I__00069	71.5	70.2	1.3	10.5	F	ab.bf.pt	BL	Mamhande	s120	5
12	I__00092	71.5	70.3	1.2	10.5	F	ab.bf.pt	BL	Mamhande	s120	5
38	I__00039	86.5	82.5	4.1	10.3	M	lb.bf.pt	BL	Hunyugwe	s36	21
39	I__00010	86.5	84.4	2.1	9.1	M	lb.bf.pt	BL	Hunyugwe	s55	21
40	I__00103	86.5	87.6	1.1	8.5	M	lb.bf.pt	BL	Hunyugwe	s35	21
41	I__00010	78.5	72.8	5.7	10.7	M	lb.bf.pt	BL	Mubangweni	s55	21
42	I__00014	78.5	72.4	6.1	10.9	M	lb.bf.pt	BL	Mubangweni	s55	21
43	I__00030	78.5	75.5	3.1	10.8	M	lb.bf.pt	BL	Mubangweni	s144	21
44	I__00191	84.6	80.2	4.4	7.1	M	lb.bf.pt	BL	Safari camp	s97	21
45	I__00195	84.6	80.1	4.5	7.1	M	lb.bf.pt	BL	Safari camp	s97	21
46	MGDC0225	84.6	79.4	5.2	7	M	lb.bf.pt	BL	Safari camp	s88	21
47	I__00009	91.5	87.5	4	9.3	M	lb.bf.pt	BL	Nduna	s44	21
48	I__00017	91.5	86	5.5	8.1	M	lb.bf.pt	BL	Nduna	s18	21
49	I__00017	70.5	74	3.5	17.2	F	lb.bf.pt	BL	Chipinyuluzi	s183	21
50	I__00021	70.5	71.7	1.2	17.2	F	lb.bf.pt	BL	Chipinyuluzi	s183	21
51	I__00042	68.5	67.2	1.3	8.7	F	lb.bf.pt	BL	Banyini	s85	21
52	I__00050	68.5	63.7	4.8	8.3	F	lb.bf.pt	BL	Banyini	s84	21
53	I__00055	68.5	67.4	1.1	8.4	F	lb.bf.pt	BL	Banyini	s85	21
54	I__00058	68.5	64.8	3.7	8.7	F	lb.bf.pt	BL	Banyini	s85	21
55	I__00063	68.5	65.3	3.3	10.6	F	lb.bf.pt	BL	Banyini	s82	21
56	I__00068	68.5	67.4	1.1	10.6	F	lb.bf.pt	BL	Banyini	s82	21
57	I__00074	68.5	67.3	1.2	11	F	lb.bf.pt	BL	Banyini	s85	21
58	I__00094	68.5	66.4	2.1	10.5	F	lb.bf.pt	BL	Banyini	s82	21
59	I__00096	68.5	66.8	1.8	10.9	F	lb.bf.pt	BL	Banyini	s82	21
60	I__00067	71.5	72.7	1.2	10.5	F	lb.bf.pt	BL	Mamhande	s120	21
61	I__00127	71.5	76.2	4.7	11.1	F	lb.bf.pt	BL	Mamhande	s120	21
62	I__00130	71.5	72.7	1.2	10.5	F	lb.bf.pt	BL	Mamhande	s120	21
63	I__00140	71.5	72.6	1.1	11.8	F	lb.bf.pt	BL	Mamhande	s203	21
127	I__00007	86.5	82.6	4	9.1	M	lb.sf.pt	BL	Hunyugwe	s55	29
128	I__00101	86.5	84.8	1.7	8.7	M	lb.sf.pt	BL	Hunyugwe	s35	29
129	I__00104	86.5	83.4	3.1	8.7	M	lb.sf.pt	BL	Hunyugwe	s35	29
130	I__00011	78.5	79.9	1.4	10.4	M	lb.sf.pt	BL	Mubangweni	s144	29
131	I__00025	78.5	77.1	1.5	11.7	M	lb.sf.pt	BL	Mubangweni	s144	29
132	I__00004	78.5	76.4	2.1	13	M	lb.sf.pt	BL	Mubangweni	s194	29
133	I__00006	78.5	74.7	3.8	13.5	M	lb.sf.pt	BL	Mubangweni	s194	29
134	I__00006	91.5	87.6	3.9	9.3	M	lb.sf.pt	BL	Nduna	s44	29
135	I__00007	91.5	88.6	2.9	9.3	M	lb.sf.pt	BL	Nduna	s44	29
136	I__00040	70.5	69.2	1.3	10	F	lb.sf.pt	BL	Chipinyuluzi	s94	29
137	I__00041	70.5	68.8	1.7	10	F	lb.sf.pt	BL	Chipinyuluzi	s94	29
138	I__00075	68.5	67.5	1	8.2	F	lb.sf.pt	BL	Banyini	s85	29
139	I__00088	68.5	67.1	1.4	8.5	F	lb.sf.pt	BL	Banyini	s85	29
140	I__00091	67.2	70.7	3.5	10	F	lb.sf.pt	BL	Swamps	s78	29
141	I__00068	71.5	70.4	1.1	10.6	F	lb.sf.pt	BL	Mamhande	s120	29
142	I__00096	71.5	72.8	1.3	10.3	F	lb.sf.pt	BL	Mamhande	s120	29
143	I__00143	71.5	70.4	1.1	11.3	F	lb.sf.pt	BL	Mamhande	s203	29
144	I__00144	71.5	74.1	2.6	11.3	F	lb.sf.pt	BL	Mamhande	s203	29
145	I__00165	71.5	69.6	1.9	11.6	F	lb.sf.pt	BL	Mamhande	s203	29
13	I__00040	189	183.4	5.6	10.4	M	ab.bf.pt	HTT	Hunyugwe	s36	6
14	I__00098	189	181.3	7.7	8.7	M	ab.bf.pt	HTT	Hunyugwe	s35	6
15	I__00005	184	175.8	8.2	11	M	ab.bf.pt	HTT	Mubangweni	s55	6
16	I__00007	184	193.1	9.1	10.5	M	ab.bf.pt	HTT	Mubangweni	s55	6
17	I__00026	184	180.9	3.1	10.8	M	ab.bf.pt	HTT	Mubangweni	s55	6
18	I__00032	184	180.5	3.5	10.8	M	ab.bf.pt	HTT	Mubangweni	s55	6
19	I__00037	167	156.2	10.8	10.1	F	ab.bf.pt	HTT	Chipinyuluzi	s94	6
20	I__00038	167	159.9	7.1	9.8	F	ab.bf.pt	HTT	Chipinyuluzi	s94	6
21	I__00090	164	173.6	9.6	9.9	F	ab.bf.pt	HTT	Swamps	s78	6
22	I__00092	164	184.4	20.4	10	F	ab.bf.pt	HTT	Swamps	s78	6
23	I__00093	164	180	16	9.9	F	ab.bf.pt	HTT	Swamps	s78	6
24	I__00069	172	181.3	9.3	10.5	F	ab.bf.pt	HTT	Mamhande	s120	6
25	I__00092	172	177	5	10.5	F	ab.bf.pt	HTT	Mamhande	s120	6
64	I__00039	189	192.6	3.6	10.3	M	lb.bf.pt	HTT	Hunyugwe	s36	22
65	I__00010	184	179.7	4.3	10.7	M	lb.bf.pt	HTT	Mubangweni	s55	22
66	I__00014	184	177	7	10.9	M	lb.bf.pt	HTT	Mubangweni	s55	22
67	I__00030	184	194.1	10.1	10.8	M	lb.bf.pt	HTT	Mubangweni	s144	22
68	I__00191	189	191.8	2.8	7.1	M	lb.bf.pt	HTT	Safari camp	s97	22
69	I__00195	189	194.6	5.6	7.1	M	lb.bf.pt	HTT	Safari camp	s97	22
70	I__00017	200	191.5	8.5	8.1	M	lb.bf.pt	HTT	Nduna	s18	22
71	I__00042	161	163.7	2.7	8.7	F	lb.bf.pt	HTT	Banyini	s85	22
72	I__00050	161	159.8	1.2	8.3	F	lb.bf.pt	HTT	Banyini	s84	22
73	I__00053	161	160.6	0.4	14.6	F	lb.bf.pt	HTT	Banyini	s185	22
74	I__00055	161	160.2	0.8	8.4	F	lb.bf.pt	HTT	Banyini	s85	22
75	I__00058	161	158.7	2.3	8.7	F	lb.bf.pt	HTT	Banyini	s85	22
76	I__00063	161	162.4	1.4	10.6	F	lb.bf.pt	HTT	Banyini	s82	22
77	I__00068	161	161.6	0.6	10.6	F	lb.bf.pt	HTT	Banyini	s82	22
78	I__00074	161	163	2	11	F	lb.bf.pt	HTT	Banyini	s85	22
79	I__00094	161	163.4	2.4	10.5	F	lb.bf.pt	HTT	Banyini	s82	22
80	I__00096	161	161.5	0.5	10.9	F	lb.bf.pt	HTT	Banyini	s82	22
81	I__00067	172	181.4	9.4	10.5	F	lb.bf.pt	HTT	Mamhande	s120	22
82	I__00127	172	181.4	9.4	11	F	lb.bf.pt	HTT	Mamhande	s120	22
83	I__00130	172	176.2	4.2	10.5	F	lb.bf.pt	HTT	Mamhande	s120	22
146	I__00011	184	209.4	25.4	10.4	M	lb.sf.pt	HTT	Mubangweni	s144	30
147	I__00025	184	193.6	9.6	11.7	M	lb.sf.pt	HTT	Mubangweni	s144	30
148	I__00009	200	192	8	9.3	M	lb.sf.pt	HTT	Nduna	s44	30
149	I__00040	167	176.1	9.1	10	F	lb.sf.pt	HTT	Chipinyuluzi	s94	30
150	I__00041	167	173.7	6.7	10	F	lb.sf.pt	HTT	Chipinyuluzi	s94	30
151	I__00075	161	160.6	0.4	8.2	F	lb.sf.pt	HTT	Banyini	s85	30
152	I__00088	161	166.3	5.3	8.5	F	lb.sf.pt	HTT	Banyini	s85	30
153	I__00091	164	177.1	13.1	10	F	lb.sf.pt	HTT	Swamps	s78	30
154	I__00068	172	176.4	4.4	10.6	F	lb.sf.pt	HTT	Mamhande	s120	30
155	I__00096	172	181.2	9.2	10.3	F	lb.sf.pt	HTT	Mamhande	s120	30
156	I__00143	172	181.3	9.3	11.3	F	lb.sf.pt	HTT	Mamhande	s203	30
157	I__00144	172	175.2	3.2	11.3	F	lb.sf.pt	HTT	Mamhande	s203	30
84	I__00005	67.5	61.4	6.1	8.6	M	lb.bf.pt	SH	Hunyugwe	s35	23
85	I__00103	67.5	66.3	1.2	8.5	M	lb.bf.pt	SH	Hunyugwe	s35	23
86	I__00010	72	54.1	17.9	10.7	M	lb.bf.pt	SH	Mubangweni	s55	23
87	I__00059	72	58.9	13.1	16.6	M	lb.bf.pt	SH	Mubangweni	s90	23
88	I__00195	73	70.1	3	7.1	M	lb.bf.pt	SH	Safari camp	s97	23
89	I__00021	73	50.4	22.6	12.9	M	lb.bf.pt	SH	Safari camp	s58	23
90	MGDC0225	73	65.1	7.9	7	M	lb.bf.pt	SH	Safari camp	s88	23
91	I__00006	70	57.6	12.4	9.3	M	lb.bf.pt	SH	Nduna	s44	23
92	I__00007	70	58.5	11.5	9.3	M	lb.bf.pt	SH	Nduna	s44	23
93	I__00009	70	65.9	4.1	9.3	M	lb.bf.pt	SH	Nduna	s44	23
94	I__00017	59	45.8	13.2	17.2	F	lb.bf.pt	SH	Chipinyuluzi	s183	23
95	I__00021	59	48.2	10.8	17.2	F	lb.bf.pt	SH	Chipinyuluzi	s183	23
96	I__00042	54	40.7	13.3	8.8	F	lb.bf.pt	SH	Banyini	s85	23
97	I__00068	54	55.1	1.1	10.6	F	lb.bf.pt	SH	Banyini	s82	23
98	I__00074	54	49.6	4.4	11.1	F	lb.bf.pt	SH	Banyini	s82	23
99	I__00084	54	48.1	5.9	8.8	F	lb.bf.pt	SH	Banyini	s85	23
100	I__00064	58.5	52	6.5	13.2	F	lb.bf.pt	SH	Mamhande	s106	23
101	I__00066	58.5	52.8	5.7	13.2	F	lb.bf.pt	SH	Mamhande	s106	23
102	I__00067	58.5	51.8	6.7	10.6	F	lb.bf.pt	SH	Mamhande	s120	23
103	I__00084	58.5	48.1	10.4	10.6	F	lb.bf.pt	SH	Mamhande	s120	23
104	I__00104	58.5	52.8	5.7	10.7	F	lb.bf.pt	SH	Mamhande	s120	23
105	I__00118	58.5	46.8	11.7	10.7	F	lb.bf.pt	SH	Mamhande	s120	23
106	I__00140	58.5	51.6	6.9	11.5	F	lb.bf.pt	SH	Mamhande	s203	23
158	I__00007	67.5	70	2.5	9.1	M	lb.sf.pt	SH	Hunyugwe	s35	31
159	I__00009	67.5	69.4	1.9	9.1	M	lb.sf.pt	SH	Hunyugwe	s35	31
160	I__00035	67.5	66.4	1.1	12.5	M	lb.sf.pt	SH	Hunyugwe	s47	31
161	I__00036	67.5	65.5	2	12.4	M	lb.sf.pt	SH	Hunyugwe	s47	31
162	I__00101	67.5	66.4	1.1	8.7	M	lb.sf.pt	SH	Hunyugwe	s35	31
163	I__00104	67.5	70.6	3.1	8.7	M	lb.sf.pt	SH	Hunyugwe	s35	31
164	I__00011	72	74	2	10.4	M	lb.sf.pt	SH	Mubangweni	s194	31
165	I__00004	72	73	1	13	M	lb.sf.pt	SH	Mubangweni	s194	31
166	I__00006	72	70.8	1.2	13.5	M	lb.sf.pt	SH	Mubangweni	s194	31
167	I__00008	72	75.4	3.4	10.9	M	lb.sf.pt	SH	Mubangweni	s55	31
168	I__00026	72	73.5	1.5	13.3	M	lb.sf.pt	SH	Mubangweni	s183	31
169	I__00033	72	66.8	5.2	10.6	M	lb.sf.pt	SH	Mubangweni	s55	31
170	I__00032	73	71.9	1.1	10	M	lb.sf.pt	SH	Safari camp	s79	31
171	I__00034	73	75.3	2.3	9.8	M	lb.sf.pt	SH	Safari camp	s79	31
172	I__00256	70	74.2	4.2	12.5	M	lb.sf.pt	SH	Nduna	s30	31
173	I__00262	70	74	4	12.5	M	lb.sf.pt	SH	Nduna	s30	31
174	I__00264	70	73.2	3.2	12.5	M	lb.sf.pt	SH	Nduna	s30	31
175	I__00041	59	55	4	10	F	lb.sf.pt	SH	Chipinyuluzi	s94	31
176	I__00066	54	52.4	1.6	10.9	F	lb.sf.pt	SH	Banyini	s82	31
177	I__00069	54	52.9	1.1	10.7	F	lb.sf.pt	SH	Banyini	s82	31
178	I__00072	54	51.3	2.7	10.7	F	lb.sf.pt	SH	Banyini	s82	31
179	I__00078	54	55.8	1.8	10.6	F	lb.sf.pt	SH	Banyini	s82	31
180	I__00159	54	56.3	2.3	16.2	F	lb.sf.pt	SH	Banyini	s74	31
181	I__00162	54	52.6	1.4	15.9	F	lb.sf.pt	SH	Banyini	s74	31
182	I__00091	61.7	62.9	1.2	10	F	lb.sf.pt	SH	Swamps	s78	31
183	I__00068	58.5	59.7	1.2	10.6	F	lb.sf.pt	SH	Mamhande	s120	31
184	I__00083	58.5	59.8	1.3	10.5	F	lb.sf.pt	SH	Mamhande	s120	31
185	I__00087	58.5	61.8	3.3	10.6	F	lb.sf.pt	SH	Mamhande	s120	31
186	I__00090	58.5	61	2.5	10.7	F	lb.sf.pt	SH	Mamhande	s120	31
187	I__00100	58.5	59.7	1.2	10.5	F	lb.sf.pt	SH	Mamhande	s120	31
188	I__00101	58.5	57.4	1.1	10.5	F	lb.sf.pt	SH	Mamhande	s120	31
189	I__00102	58.5	57.1	1.4	10.6	F	lb.sf.pt	SH	Mamhande	s120	31
190	I__00103	58.5	57.4	1.1	10.5	F	lb.sf.pt	SH	Mamhande	s120	31
191	I__00106	58.5	57.3	1.2	10.5	F	lb.sf.pt	SH	Mamhande	s120	31
192	I__00144	58.5	59.6	1.1	11.3	F	lb.sf.pt	SH	Mamhande	s203	31
193	I__00165	58.5	57.3	1.3	11.5	F	lb.sf.pt	SH	Mamhande	s203	31
194	I__00167	58.5	60.3	1.8	10.1	F	lb.sf.pt	SH	Mamhande	s197	31
195	I__00168	58.5	62.3	3.8	10.3	F	lb.sf.pt	SH	Mamhande	s197	31
196	I__00171	58.5	59.7	1.2	10.2	F	lb.sf.pt	SH	Mamhande	s197	31
26	I__00040	76.5	71.6	4.9	10.4	M	ab.bf.pt	TL	Hunyugwe	s36	8
27	I__00098	76.5	71.8	4.7	8.7	M	ab.bf.pt	TL	Hunyugwe	s35	8
28	I__00005	74	57.8	16.2	11	M	ab.bf.pt	TL	Mubangweni	s55	8
29	I__00007	74	77.1	3.1	10.5	M	ab.bf.pt	TL	Mubangweni	s55	8
30	I__00026	74	70.3	3.7	10.8	M	ab.bf.pt	TL	Mubangweni	s55	8
31	I__00032	74	68	6	10.8	M	ab.bf.pt	TL	Mubangweni	s55	8
32	I__00038	74.5	68.5	6	9.8	F	ab.bf.pt	TL	Chipinyuluzi	s94	8
33	I__00090	73	74.7	1.7	9.9	F	ab.bf.pt	TL	Swamps	s78	8
34	I__00092	73	77.8	4.8	10	F	ab.bf.pt	TL	Swamps	s78	8
35	I__00093	73	71	2	9.9	F	ab.bf.pt	TL	Swamps	s78	8
36	I__00069	78	76.1	1.9	10.5	F	ab.bf.pt	TL	Mamhande	s120	8
37	I__00092	78	75.3	2.7	10.5	F	ab.bf.pt	TL	Mamhande	s120	8
107	I__00039	76.5	79.4	2.9	10.3	M	lb.bf.pt	TL	Hunyugwe	s36	24
108	I__00010	74	71.4	2.6	10.7	M	lb.bf.pt	TL	Mubangweni	s55	24
109	I__00014	74	63.2	10.8	10.9	M	lb.bf.pt	TL	Mubangweni	s55	24
110	I__00030	74	80.1	6.1	10.8	M	lb.bf.pt	TL	Mubangweni	s144	24
111	I__00191	77.5	79.2	1.7	7.1	M	lb.bf.pt	TL	Safari camp	s97	24
112	I__00195	77.5	80.9	3.4	7.1	M	lb.bf.pt	TL	Safari camp	s97	24
113	I__00009	81	74.5	6.5	9.3	M	lb.bf.pt	TL	Nduna	s44	24
114	I__00017	81	75	6	8.1	M	lb.bf.pt	TL	Nduna	s18	24
115	I__00042	71	65.9	5.1	8.7	F	lb.bf.pt	TL	Banyini	s85	24
116	I__00050	71	63.9	7.1	8.3	F	lb.bf.pt	TL	Banyini	s85	24
117	I__00055	71	59.9	11.1	8.4	F	lb.bf.pt	TL	Banyini	s185	24
118	I__00058	71	61.4	9.6	8.7	F	lb.bf.pt	TL	Banyini	s85	24
119	I__00063	71	63	8.1	10.6	F	lb.bf.pt	TL	Banyini	s82	24
120	I__00068	71	62.2	8.9	10.6	F	lb.bf.pt	TL	Banyini	s82	24
121	I__00074	71	63.3	7.7	11	F	lb.bf.pt	TL	Banyini	s85	24
122	I__00094	71	62.7	8.3	10.5	F	lb.bf.pt	TL	Banyini	s82	24
123	I__00096	71	63.9	7.2	10.9	F	lb.bf.pt	TL	Banyini	s82	24
124	I__00068	78	72.3	5.7	10.6	F	lb.bf.pt	TL	Mamhande	s120	24
125	I__00127	78	79.3	1.3	11.1	F	lb.bf.pt	TL	Mamhande	s120	24
126	I__00130	78	71.2	6.8	10.5	F	lb.bf.pt	TL	Mamhande	s120	24
197	I__00011	74	84.2	10.2	10.4	M	lb.sf.pt	TL	Mubangweni	s144	32
198	I__00025	74	75.2	1.2	11.7	M	lb.sf.pt	TL	Mubangweni	s144	32
199	I__00256	81	75.5	5.5	12.5	M	lb.sf.pt	TL	Nduna	s30	32
200	I__00262	81	79.6	1.4	12.5	M	lb.sf.pt	TL	Nduna	s30	32
201	I__00264	81	77.9	3.1	12.5	M	lb.sf.pt	TL	Nduna	s30	32
202	I__00040	74.5	75.6	1.1	10	F	lb.sf.pt	TL	Chipinyuluzi	s94	32
203	I__00041	74.5	72.5	2.1	10	F	lb.sf.pt	TL	Chipinyuluzi	s94	32
204	I__00075	71	60.6	10.5	8.2	F	lb.sf.pt	TL	Banyini	s85	32
205	I__00088	71	65	6	8.5	F	lb.sf.pt	TL	Banyini	s85	32
206	I__00091	73	71.9	1.1	10	F	lb.sf.pt	TL	Swamps	s78	32
207	I__00067	78	74.5	3.5	10.5	F	lb.sf.pt	TL	Mamhande	s120	32
208	I__00096	78	75	3.1	10.3	F	lb.sf.pt	TL	Mamhande	s120	32
209	I__00143	78	79.2	1.2	11.3	F	lb.sf.pt	TL	Mamhande	s203	32
210	I__00144	78	69.3	8.7	11.3	F	lb.sf.pt	TL	Mamhande	s203	32
